# Supplementary material for: ACE2 receptor polymorphism in humans and animals increases the risk of the emergence of SARS-CoV-2 variants during repeated intra- and inter-species host-switching of the virus
Source: Frontiers journal article supplement (doi:10.3389/fmicb.2023.1199561), 2023-07-13
Supplement: Data_Sheet_1.PDF [file Data_Sheet_1.PDF]

## *Supplementary Material*

# **ACE2 receptor polymorphism in humans and animals increases the risk of the emergence of SARS-CoV-2 variants during repeated intra- and inter-species host-switching of the virus**

**Christian A. Devaux<sup>\*</sup>, Jacques Fantini**

**\* Correspondence:** Corresponding Author: christian.devaux@mediterranee-infection.com

### **1 Supplementary Data**

SARS-CoV-2 circulation in animal species (adapted from a Vetmeduni report).

### **2 Supplementary Figure S1**

### **3 Supplementary Figure S2**

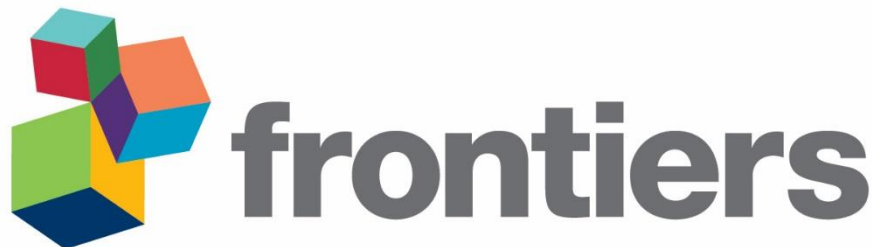

**Supplementary Figure S1.** SARS-CoV-2 circulation in animal species (adapted from a Vetmeduni report). According to the reference site Vetmeduni/Complexity Science Hub, Vienna reference site (<https://vis.csh.ac.at/sars-ani/>) which reported an overview of SARS-CoV-2 events in animals between January 2020 and December 2022. 616 outbreaks of SARS-CoV-2 had been reported in 31 animal species with a 2.8% fatality rate occurring in 39 countries.

**Supplementary Figure S2**

Clustal Omega multiple sequence alignment (EMBL-EBI bioinformatic tool; Copyright EMBL 2020) was used to compare the protein sequences of Homo sapiens (Hum) ACE2 (GenBank: BAB40370.1) and deer (Cervus elaphus; CervusE) ACE2 (NCBI databank: XP\_043752042.1). The amino acids that differ between deer and human are shown in yellow. Amino acid sequences important for the viral S protein binding to ACE2 are indicated by an arrow.
